# Supplementary material for: Wheat and Barley Grass Juice Addition to a Plant-Based Feed Improved Growth and Flesh Quality of Common Carp (Cyprinus carpio)
Source: MDPI journal article supplement (doi:10.3390/ani12081046), 2022-04-17
Supplement: s1 [file s1]

**Table S1.** The lipid profile of wheat grass juice (WGJ) and barley grass juice (BGJ).

| Peak | RT    | RI   | Compound<br>(mg/g dw)            |         | Type of FA | WGJ           | BGJ          |
|------|-------|------|----------------------------------|---------|------------|---------------|--------------|
| 1    | 19.58 | 1320 | decanoic acid methyl ester       | C10:0   | SFA        | 10.13 ± 0.66  | 8.16 ± 0.53  |
| 2    | 22.39 | 1536 | dodecanoic acid methyl ester     | C12:0   | SFA        | 6.60 ± 0.43   | 7.92 ± 0.48  |
| 3    | 24.94 | 1728 | tetradecanoic acid methyl ester  | C14:0   | SFA        | 3.09 ± 0.20   | 3.71 ± 0.24  |
| 4    | 27.09 | 1904 | palmitoleic acid methyl ester    | C16:1n7 | MUFA       | 2.35 ± 0.15   | 2.85 ± 0.19  |
| 5    | 27.23 | 1925 | palmitic acid methyl ester       | C16:0   | SFA        | 21.66 ± 1.422 | 16.91 ± 1.11 |
| 6    | 30.41 | 2096 | linoleic acid methyl ester (Ω6)  | C18:2n6 | PUFA       | 3.88 ± 0.25   | 4.66 ± 0.30  |
| 7    | 30.46 | 2099 | oleic acid methyl ester          | C18:1n9 | MUFA       | 0.65 ± 0.04   | 0.48 ± 0.03  |
| 8    | 30.50 | 2102 | linolenic acid methyl ester (Ω3) | C18:3n3 | PUFA       | 42.08 ± 2.75  | 45.49 ± 2.98 |
| 9    | 31.02 | 2111 | stearic acid methyl ester        | C18:0   | SFA        | 4.20 ± 0.27   | 3.37 ± 0.22  |
| 10   | 34.08 | 2328 | arachidic acid methyl ester      | C20:0   | SFA        | 0.54 ± 0.04   | 1.02 ± 0.07  |
| 11   | 37.72 | 2534 | behenic acid methyl ester        | C22:0   | SFA        | 2.97 ± 0.19   | 3.76 ± 0.25  |

RT – retention time, RI – retention index, SFA - saturated fatty acids, MUFA – monounsaturated fatty acids, PUFA – polyunsaturated fatty acids

**Table S2.** The polar metabolites profile of wheat grass juice (WGJ) and barley grass juice (BGJ).

| Peak | RT    | RI   | Compound<br>(mg/g dw)  | WGJ          | BGJ          |
|------|-------|------|------------------------|--------------|--------------|
| 1    | 4.31  | 1092 | alanine                | 0.09 ± 0.02  | Nd           |
| 2    | 4.43  | 1207 | valine                 | 0.14 ± 0.03  | 0.11 ± .03   |
| 3    | 4.62  | 1222 | malonic acid           | 1.50 ± 0.35  | 1.13 ± 0.026 |
| 4    | 5.05  | 1240 | methylmalonic acid     | 1.25 ± 0.29  | 0.94 ± 0.222 |
| 5    | 5.38  | 1259 | 4-hydroxybutanoic acid | 0.14 ± 0.03  | 0.10 ± 0.02  |
| 6    | 5.85  | 1277 | leucine                | 1.81 ± 0.42  | 1.36 ± 00.32 |
| 7    | 5.94  | 1290 | glycerol               | 10.85 ± 2.54 | 15.13 ± 3.54 |
| 8    | 6.19  | 1297 | isoleucine             | 3.65 ± 0.85  | 2.74 ± 0.64  |
| 9    | 6.37  | 1308 | succinic acid          | 4.49 ± 1.05  | 3.36 ± 0.779 |
| 10   | 6.49  | 1325 | fumaric acid           | 0.68 ± 0.16  | 0.51 ± 0.12  |
| 11   | 6.64  | 1356 | itaconic acid          | 1.16 ± 0.27  | 0.87 ± 0.20  |
| 12   | 6.82  | 1375 | threonine              | 0.75 ± 0.18  | 0.56 ± 0.13  |
| 13   | 6.88  | 1401 | n-tetradecane          | 0.23 ± 0.05  | 0.17 ± 0.04  |
| 14   | 8.53  | 1477 | malic acid             | 0.41 ± 0.10  | 0.31 ± 0.07  |
| 15   | 8.64  | 1488 | threitol               | 0.96 ± 0.22  | 0.72 ± 0.17  |
| 16   | 8.74  | 1493 | erythreol              | 0.22 ± 0.05  | 0.16 ± 0.04  |
| 17   | 8.95  | 1502 | aspartic acid          | 2.06 ± 0.48  | 1.55 ± 0.36  |
| 18   | 9.05  | 1510 | salicylic acid         | 0.14 ± 0.03  | 0.11 ± 0.03  |
| 19   | 9.13  | 1518 | pyroglutamic acid      | 0.34 ± 0.08  | 0.25 ± 0.06  |
| 20   | 9.25  | 1550 | cinnamic acid          | 0.15 ± 0.03  | 0.10 ± 0.02  |
| 21   | 9.44  | 1601 | n-hexadecane           | 0.31 ± 0.07  | 0.23 ± 0.05  |
| 22   | 9.69  | 1626 | phenylalanine          | 0.27 ± 0.06  | 0.20 ± 0.05  |
| 23   | 9.81  | 1642 | p-hydroxybenzoic acid  | 0.20 ± 0.05  | 0.15 ± 0.04  |
| 24   | 9.92  | 1659 | asparagine             | 0.15 ± 0.04  | 0.11 ± 0.03  |
| 25   | 10.55 | 1690 | xylitol                | 2.02 ± 0.47  | 3.51 ± 0.82  |
| 26   | 10.64 | 1699 | arabitol               | 0.98 ± 0.23  | 0.74 ± 0.17  |
| 27   | 11.21 | 1728 | trans-aconitic acid    | 1.37 ± 0.32  | 2.03 ± 0.47  |
| 28   | 11.49 | 1764 | gutamine               | 0.21 ± 0.05  | 0.16 ± 0.04  |
| 29   | 11.57 | 1775 | vanillic acid          | 0.28 ± 0.07  | 0.21 ± 0.05  |

|    |       |      |                                        |             |             |
|----|-------|------|----------------------------------------|-------------|-------------|
| 30 | 12.01 | 1850 | fructose isomer                        | 3.41 ± 0.80 | 0.56 ± 0.13 |
| 31 | 12.13 | 1860 | fructose isomer                        | 3.23 ± 0.76 | 0.42 ± 0.10 |
| 32 | 12.21 | 1877 | syringic acid                          | 0.47 ± 0.11 | 0.35 ± 0.08 |
| 33 | 12.38 | 1881 | galactose isomer                       | 0.17 ± 0.04 | 0.13 ± 0.03 |
| 34 | 12.53 | 1889 | glucose isomer                         | 0.20 ± 0.05 | 0.15 ± 0.03 |
| 35 | 12.84 | 1897 | galactose isomer                       | 0.19 ± 0.04 | 0.14 ± 0.03 |
| 36 | 12.92 | 1902 | glucose isomer                         | 0.17 ± 0.04 | 0.12 ± 0.03 |
| 37 | 13.03 | 1911 | lysine                                 | 0.25 ± 0.06 | 0.19 ± 0.04 |
| 38 | 13.18 | 1930 | tyrosine                               | 0.55 ± 0.13 | 0.41 ± 0.10 |
| 39 | 13.91 | 1942 | glucitol                               | 0.90 ± 0.21 | 0.67 ± 0.16 |
| 40 | 13.97 | 1961 | dulcitol                               | 9.32 ± 2.18 | 4.99 ± 1.17 |
| 41 | 16.60 | 2090 | myo-inositol                           | 0.62 ± 0.15 | 1.47 ± 0.34 |
| 42 | 24.80 | 2620 | alpha-D-Glc-(1,2)-beta-D-Fru (Sucrose) | 0.10 ± 0.02 | Nd          |

RT- retention time, RI – retention index, Nd – not detected.

**Table S3.** Fatty acid content (mg/g, dw) depending on the degree of unsaturation in wheat grass juice (WGJ) and barley grass juice (BGJ).

| Extract | SFA   | MUFA | PUFA  | UFA   | SFA / UFA | PUFA / MUFA | Ω6/Ω3 |
|---------|-------|------|-------|-------|-----------|-------------|-------|
| WGJ     | 49.19 | 3.00 | 45.96 | 48.96 | 1.00      | 15.32       | 0.09  |
| BGJ     | 44.85 | 3.33 | 50.15 | 53.48 | 0.83      | 15.06       | 0.10  |

SFA - saturated fatty acids, MUFA – monounsaturated fatty acids, PUFA – polyunsaturated fatty acids, UFA – total unsaturated fatty acids.

**Table S4.** Fatty acid profile in common carp meat (g FAME/100 g total FAME) fed with a plant based diet supplemented with 2% wheat grass juice and barley grass juice.

| No. | Fatty Acid Methyl Esters (FAME) | Type of FA | Con  | Con+WGJ | Con+BGJ |       |
|-----|---------------------------------|------------|------|---------|---------|-------|
| 1   | caproic acid                    | C6:0       | SFA  | 0.07    | 0.07    | 0.06  |
| 2   | caprilic acid                   | C8:0       | SFA  | 0.28    | 0.26    | 0.25  |
| 3   | capric acid                     | C10:0      | SFA  | 0.22    | 0.22    | 0.21  |
| 4   | miristic acid                   | C14:0      | SFA  | 0.96    | 0.95    | 0.91  |
| 5   | pentadecanoic acid              | C15:0      | SFA  | 0.14    | 0.17    | 0.16  |
| 6   | pentadecenoic acid              | C15:1      | MUFA | 0.16    | 0.13    | 0.12  |
| 7   | palmitic acid                   | C16:0      | SFA  | 16.02   | 15.47   | 15.04 |
| 8   | palmitoleic acid                | C16:1      | MUFA | 3.72    | 3.27    | 3.21  |
| 9   | heptadecanoic acid              | C17:0      | SFA  | 0.14    | 0.07    | 0.15  |
| 10  | heptadecenoic acid              | C17:1      | MUFA | 0.17    | 0.23    | 0.23  |
| 11  | stearic acid                    | C18:0      | SFA  | 4.46    | 4.31    | 4.34  |
| 12  | oleic acid cis                  | C18:1n9    | MUFA | 39.78   | 39.16   | 39.22 |
| 13  | linoleic acid cis (Ω6)          | C18:2n6    | PUFA | 21.53   | 22.48   | 21.98 |
| 14  | γ-linolenic acid (Ω6)           | C18:3n6    | PUFA | 0.38    | 0.39    | 0.34  |
| 15  | α-linolenic acid (Ω3)           | C18:3n3    | PUFA | 3.33    | 3.90    | 3.43  |
| 16  | conjugated linoleic acid        | C18:2      | PUFA | 0.17    | 0.20    | 0.13  |
| 17  | octadecatetraenoic acid (Ω3)    | C18:4n3    | PUFA | 1.57    | 1.82    | 2.29  |
| 18  | eicosadienoic acid (Ω6)         | C20:2n6    | PUFA | 0.10    | 0.11    | 0.14  |
| 19  | eicosatrienoic acid (Ω6)        | C20:3n6    | PUFA | 0.62    | 0.62    | 0.71  |
| 20  | eicosatrienoic acid (Ω3)        | C20:3n3    | PUFA | 0.82    | 0.80    | 0.80  |
| 21  | arachidonic acid (Ω6)           | C20:4n6    | PUFA | 1.84    | 1.81    | 2.03  |
| 22  | tricosanoic acid                | C23:0      | SFA  | 0.12    | 0.11    | 0.09  |
| 23  | docosadienoic acid (Ω6)         | C22:2n6    | PUFA | 0.12    | 0.12    | 0.10  |

|    |                                      |         |      |      |      |      |
|----|--------------------------------------|---------|------|------|------|------|
| 24 | eicosapentaenoic acid ( $\Omega 3$ ) | C20:5n3 | PUFA | 0.38 | 0.41 | 0.37 |
| 25 | docosatrienoic acid ( $\Omega 6$ )   | C22:3n6 | PUFA | 0.03 | 0.00 | 0.19 |
| 26 | nervonic acid                        | C24:1n9 | MUFA | 0.11 | 0.17 | 0.12 |
| 27 | docosatetraenoic acid ( $\Omega 6$ ) | C22:4n6 | PUFA | 0.24 | 0.31 | 0.49 |
| 28 | docosapentaenoic acid ( $\Omega 3$ ) | C22:5n3 | PUFA | 0.27 | 0.24 | 0.23 |
| 29 | docosahexaenoic acid ( $\Omega 3$ )  | C22:6n3 | PUFA | 2.16 | 2.13 | 2.60 |
| 30 | other FA                             |         |      | 0.08 | 0.09 | 0.08 |

SFA - saturated fatty acids, MUFA – monounsaturated fatty acids, PUFA – polyunsaturated fatty acids, Con – control, WGJ – wheat grass juice, BGJ – barley grass juice.

**Table S5.** Fatty acid content (g FAME/100 g total FAME) depending on the degree of unsaturation in common carp meat fed with a plant based diet supplemented with 2% wheat grass juice and barley grass juice.

| Sample  | SFA   | MUFA  | PUFA  | UFA   | SFA / UFA | PUFA / MUFA |
|---------|-------|-------|-------|-------|-----------|-------------|
| Con     | 22.42 | 44.33 | 32.56 | 76.88 | 0.29      | 0.73        |
| Con+WGJ | 21.61 | 43.35 | 34.33 | 77.68 | 0.28      | 0.79        |
| Con+BGJ | 21.22 | 43.23 | 34.76 | 77.99 | 0.27      | 0.80        |

SFA - saturated fatty acids, MUFA – monounsaturated fatty acids, PUFA – polyunsaturated fatty acids, UFA – total unsaturated fatty acids, Con – control, WGJ – wheat grass juice, BGJ – barley grass juice.

**Table S6.** The  $\Omega 3$  and  $\Omega 6$  fatty acid content (g FAME/100 g total FAME) in common carp meat fed with a plant based diet supplemented with 2% wheat grass juice and barley grass juice.

| Sample  | $\Omega 3$ | $\Omega 6$ | $\Omega 6/\Omega 3$ |
|---------|------------|------------|---------------------|
| Con     | 8.57       | 23.83      | 2.78                |
| Con+WGJ | 9.29       | 24.83      | 2.67                |
| Con+BGJ | 9.89       | 24.74      | 2.50                |

Con – control, WGJ – wheat grass juice, BGJ – barley grass juice.
